# Supplementary material
Source: PubMed Central journal article supplement (PMC5924699)
Supplement: NIHMS959929-supplement-supplemental_data.pdf [file NIHMS959929-supplement-supplemental_data.pdf]

## Supplementary Online Content

Wang DD, Leung CW, Li Y, et al. Trends in dietary quality among adults in the United States, 1999 through 2010. *JAMA Intern Med*. Published online September 1, 2014. doi:10.1001/jamainternmed.2014.3422

**eTable 1.** Classification of the Alternate Healthy Eating Index-2010 Food Groups

**eTable 2.** Energy-Adjusted Alternate Healthy Eating Index-2010 Scores Without the Trans Fat Component

**eTable 3.** Energy-Adjusted Alternate Healthy Eating Index-2010 Component Scores, Without the Trans Fat Component, Across Subpopulations

**eTable 4.** Healthy Eating Index-2010 Scores Across Subpopulations

**eTable 5.** Healthy Eating Index-2010 Component Scores

**eTable 6.** Covariates-Adjusted Healthy Eating Index-2010 Score Across Subpopulations

**eFigure 1.** Healthy Eating Index-2010 Component Score Among Adults Aged 20-85 Years by the NHANES Survey Cycle

**eFigure 2.** Healthy Eating Index-2010 Score Among Different Socioeconomic Status (SES) by the NHANES Survey Cycle

This supplementary material has been provided by the authors to give readers additional information about their work.

**eTable 1. Classification of the Alternate Healthy Eating Index-2010 Food Groups**

| Food group                                | Full weight                                                                                                 | Half weight                                                                                 | Exclusion                                                                                      | Serving size                                                                 |
|-------------------------------------------|-------------------------------------------------------------------------------------------------------------|---------------------------------------------------------------------------------------------|------------------------------------------------------------------------------------------------|------------------------------------------------------------------------------|
| Vegetables                                | Dark-green vegetables, deep-yellow vegetables, tomatoes (raw & cooked), and other vegetables (raw & cooked) | Tomato mixtures, tomato sandwiches, vegetables with sauces, vegetable soups, and baby foods | Potatoes and starchy vegetables, tomato juices, tomato sauces, olives, pickles, and relishes   | 65 g (0.5 cup)                                                               |
| Fruit                                     | Citrus, dried fruits, other fruits, berries, and fruit mixtures                                             | Mixtures with non-fruits and baby food mixtures                                             | Juices, fruit desserts and fruit-flavored puddings                                             | 65 g (0.5 cup)                                                               |
| Whole grains                              | Brown rice, popcorn, and any grain food with a carbohydrate-to-fiber ratio $\leq 10:1$                      | NA                                                                                          | NA                                                                                             | 40 g (1 cup) of cereal<br>75 g (0.5 cup) of pasta<br>30 g (1 slice) of bread |
| Sugar-sweetened beverages and fruit juice |                                                                                                             |                                                                                             |                                                                                                |                                                                              |
| Sugar-sweetened beverages                 | Soft drinks, fruitades, other beverages, Frappuccino, fruit drinks, sweetened water, and smoothie drinks    | Reduced sugar sodas                                                                         | NA                                                                                             | 226.8 g (8 oz)                                                               |
| 100% juice                                | Citrus fruit juice, other fruit juice, nectars                                                              | Baby food fruit juice mixtures                                                              | NA                                                                                             | 113.4 g (4 oz)                                                               |
| Nuts and legumes                          |                                                                                                             |                                                                                             |                                                                                                |                                                                              |
| Nuts/Legumes/Seeds                        | Dried beans, dried bean mixtures, dried peas, lentils, and bean mixtures; nuts, nut mixtures, and seeds,    | Frozen plate meals, soups, and legumes baby food                                            | Soybean-derived products, meat substitutes, nut butters, coconut beverages, and carob products | 50 g                                                                         |
| Nut butters                               | Almond, cashew, and peanut butters                                                                          | Peanut butter and jelly and nut butter sandwiches                                           | Nut gravy and peanut sauce                                                                     | 32 g                                                                         |
| Tofu                                      | Soybean curd, soybeans, and soy nuts                                                                        | Soy yogurt, soy dessert, tofu soup, and tofu mixed dishes                                   | NA                                                                                             | 50 g                                                                         |
| Soy milk                                  | NA                                                                                                          | Regular and low-fat soy milk                                                                | NA                                                                                             | 50 g                                                                         |
| Red/processed meat                        |                                                                                                             |                                                                                             |                                                                                                |                                                                              |
| Beef                                      | Beef steak, ribs,                                                                                           | Beef baby food,                                                                             | Beef bacon                                                                                     | 100 g (3.5 oz)                                                               |

|                |                                                                                                   |                                                                                                                                                                                    |                                                |                                                          |
|----------------|---------------------------------------------------------------------------------------------------|------------------------------------------------------------------------------------------------------------------------------------------------------------------------------------|------------------------------------------------|----------------------------------------------------------|
|                | roasts, ground beef, patties, and meatballs                                                       | beef with gravy or sauce, beef with starch item, beef with starch item and vegetables, beef with vegetables, sandwiches, frozen meals, soups, broths, and extracts                 |                                                |                                                          |
| Pork           | Pork chops, steaks, cutlets, ham, roasts, and spareribs                                           | Pork baby food, beef with gravy or sauce, pork with starch item, pork with starch item and vegetables, pork with vegetables, sandwiches, frozen meals, soups, broths, and extracts | Canadian bacon, bacon/salt pork, and pork skin | 100 g (3.5 oz)                                           |
| Processed meat | Canadian bacon, bacon, salt pork, Frankfurters, sausages, lunchmeats, meat spreads, and pork skin | Sandwiches with frankfurters, luncheon meat, and potted meat sandwiches                                                                                                            | NA                                             | 100 g (3.5 oz)                                           |
| Alcohol        | Beer, wine and distilled liquors                                                                  | Cocktails                                                                                                                                                                          | NA                                             | 141.75 g of wine<br>340.2 g of beer<br>42.53 g of liquor |

**eTable 2. Energy-Adjusted Alternate Healthy Eating Index-2010 Scores, Without the *Trans* Fat Component, Across Subpopulations. Data are based on adults aged 20-85 from NHANES 1999-2010<sup>a</sup>**

|                           | 1999-2000<br>(N=4247) | 2001-2002<br>(N=4736) | 2003-2004<br>(N=4447) | 2005-2006<br>(N=4519) | 2007-2008<br>(N=5416) | 2009-2010<br>(N=5759) | <i>P</i> <sub>linear trend<sup>b</sup></sub> | <i>P</i> <sub>quadratic term<sup>c</sup></sub> |
|---------------------------|-----------------------|-----------------------|-----------------------|-----------------------|-----------------------|-----------------------|----------------------------------------------|------------------------------------------------|
| Total                     | 34.2<br>(33.1, 35.2)  | 34.8<br>(34.2, 35.5)  | 34.9<br>(33.9, 35.9)  | 35.6<br>(34.6, 36.7)  | 35.9<br>(34.8, 37.0)  | 37.1<br>(36.6, 37.7)  | <.001                                        | 0.36                                           |
| <b>Gender</b>             |                       |                       |                       |                       |                       |                       |                                              |                                                |
| Female                    | 35.5<br>(34.4, 36.7)  | 36.8<br>(36.0, 37.6)  | 36.4<br>(35.3, 37.6)  | 37.8<br>(36.6, 39.0)  | 37.8<br>(36.6, 38.9)  | 38.9<br>(38.3, 39.5)  | <.001                                        | 0.73                                           |
| Male                      | 32.5<br>(31.2, 33.8)  | 32.6<br>(31.7, 33.4)  | 33.1<br>(32.1, 34.2)  | 33.2<br>(32.1, 34.2)  | 33.8<br>(32.4, 35.1)  | 35.1<br>(34.3, 35.9)  | <.001                                        | 0.18                                           |
| <b>Age groups (years)</b> |                       |                       |                       |                       |                       |                       |                                              |                                                |
| 20-39                     | 30.3<br>(29.1, 31.4)  | 30.9<br>(29.8, 32.0)  | 31.5<br>(30.0, 32.9)  | 31.7<br>(30.1, 33.2)  | 31.8<br>(30.6, 33.0)  | 33.7<br>(32.7, 34.7)  | <.001                                        | 0.37                                           |
| 40-59                     | 35.5<br>(34.0, 37.0)  | 35.9<br>(35.0, 36.7)  | 35.2<br>(34.1, 36.3)  | 36.9<br>(35.5, 38.2)  | 36.8<br>(35.4, 38.2)  | 37.8<br>(37.0, 38.5)  | <.001                                        | 0.33                                           |
| ≥60                       | 38.2<br>(37.5, 38.8)  | 38.9<br>(38.0, 39.8)  | 39.5<br>(38.6, 40.3)  | 39.3<br>(38.4, 40.2)  | 40.4<br>(39.3, 41.5)  | 40.6<br>(39.8, 41.4)  | <.001                                        | 0.99                                           |
| <b>Education</b>          |                       |                       |                       |                       |                       |                       |                                              |                                                |
| < 12 years                | 33.2<br>(32.1, 34.2)  | 33.3<br>(32.4, 34.2)  | 33.7<br>(32.5, 34.8)  | 34.1<br>(33.2, 35.0)  | 34.2<br>(33.2, 35.2)  | 34.9<br>(33.7, 36.2)  | 0.02                                         | 0.69                                           |
| Completed 12 years        | 32.3<br>(30.7, 33.9)  | 32.8<br>(31.7, 33.9)  | 32.3<br>(31.0, 33.5)  | 33.3<br>(32.0, 34.6)  | 33.0<br>(31.8, 34.2)  | 33.4<br>(32.5, 34.3)  | 0.16                                         | 0.87                                           |
| Some college              | 33.6<br>(32.7, 34.6)  | 34.3<br>(33.4, 35.2)  | 34.8<br>(33.5, 36.1)  | 35.3<br>(33.7, 36.9)  | 35.7<br>(34.4, 37.0)  | 36.4<br>(35.5, 37.2)  | <.001                                        | 0.98                                           |
| Completed college         | 38.2<br>(36.5, 39.9)  | 38.2<br>(36.9, 39.5)  | 38.8<br>(37.8, 39.7)  | 38.9<br>(37.7, 40.2)  | 40.1<br>(38.6, 41.6)  | 41.9<br>(41.1, 42.8)  | <.001                                        | 0.03                                           |
| <b>Family PIR</b>         |                       |                       |                       |                       |                       |                       |                                              |                                                |
| < 1.30                    | 32.6<br>(31.0, 34.1)  | 31.9<br>(30.3, 33.4)  | 32.5<br>(30.9, 34.1)  | 33.6<br>(32.4, 34.8)  | 32.8<br>(31.1, 34.6)  | 33.3<br>(32.7, 34.0)  | 0.15                                         | 0.93                                           |
| 1.30 - 3.49               | 32.9<br>(31.9, 33.8)  | 33.8<br>(32.9, 34.6)  | 34.8<br>(33.6, 35.9)  | 34.1<br>(32.9, 35.3)  | 35.5<br>(34.5, 36.5)  | 35.9<br>(35.0, 36.8)  | <.001                                        | 0.94                                           |
| ≥ 3.50                    | 36.1<br>(35.1, 37.1)  | 36.9<br>(36.1, 37.7)  | 36.4<br>(35.5, 37.3)  | 37.6<br>(36.4, 38.7)  | 37.1<br>(35.6, 38.5)  | 39.8<br>(38.8, 40.8)  | <.001                                        | 0.03                                           |
| <b>Race/Ethnicity</b>     |                       |                       |                       |                       |                       |                       |                                              |                                                |
| NH white                  | 34.5<br>(33.2, 35.8)  | 35.1<br>(34.1, 36.0)  | 35.2<br>(34.0, 36.4)  | 36.1<br>(35.0, 37.1)  | 36.1<br>(34.4, 37.8)  | 37.6<br>(36.8, 38.4)  | <.001                                        | 0.34                                           |

|                          |                         |                         |                         |                         |                         |                         |       |      |
|--------------------------|-------------------------|-------------------------|-------------------------|-------------------------|-------------------------|-------------------------|-------|------|
| NH black                 | 31.9<br>(30.6,<br>33.2) | 32.4<br>(31.1,<br>33.7) | 31.6<br>(30.3,<br>32.9) | 32.0<br>(30.6,<br>33.3) | 33.0<br>(32.0,<br>34.1) | 33.3<br>(32.3,<br>34.3) | 0.03  | 0.24 |
| Mexican American         | 35.2<br>(33.6,<br>36.8) | 36.1<br>(34.9,<br>37.2) | 35.6<br>(33.9,<br>37.2) | 36.4<br>(34.7,<br>38.2) | 36.8<br>(35.6,<br>38.0) | 37.2<br>(36.6,<br>37.9) | 0.005 | 0.79 |
| Other                    | 33.3<br>(31.6,<br>34.9) | 34.4<br>(32.3,<br>36.4) | 36.2<br>(34.7,<br>37.7) | 35.5<br>(33.0,<br>38.0) | 36.6<br>(34.8,<br>38.5) | 37.5<br>(36.3,<br>38.8) | <.001 | 0.71 |
| BMI (kg/m <sup>2</sup> ) |                         |                         |                         |                         |                         |                         |       |      |
| <25                      | 34.0<br>(32.0,<br>36.0) | 35.6<br>(34.6,<br>36.6) | 35.1<br>(33.5,<br>36.7) | 36.3<br>(35.0,<br>37.5) | 36.3<br>(34.5,<br>38.1) | 37.8<br>(36.7,<br>38.9) | <.001 | 0.64 |
| 25-30                    | 34.7<br>(33.6,<br>35.7) | 34.6<br>(33.8,<br>35.5) | 35.8<br>(34.6,<br>36.9) | 35.8<br>(34.6,<br>37.0) | 35.8<br>(34.2,<br>37.4) | 38.1<br>(37.1,<br>39.0) | <.001 | 0.15 |
| 30-35                    | 33.5<br>(32.5,<br>34.6) | 34.3<br>(33.1,<br>35.5) | 33.6<br>(32.5,<br>34.6) | 34.9<br>(33.7,<br>36.1) | 35.7<br>(34.5,<br>37.0) | 36.0<br>(35.5,<br>36.5) | <.001 | 0.38 |
| ≥35                      | 33.7<br>(32.5,<br>34.9) | 33.8<br>(32.4,<br>35.2) | 34.1<br>(32.1,<br>36.1) | 34.7<br>(33.3,<br>36.1) | 35.4<br>(34.4,<br>36.4) | 35.2<br>(33.9,<br>36.5) | 0.04  | 0.89 |
| SES                      |                         |                         |                         |                         |                         |                         |       |      |
| Low                      | 33.5<br>(32.2,<br>34.9) | 32.1<br>(31.1,<br>33.1) | 32.4<br>(30.9,<br>33.8) | 34.5<br>(33.2,<br>35.8) | 33.0<br>(31.0,<br>35.0) | 32.8<br>(31.5,<br>34.0) | 0.89  | 0.74 |
| Medium                   | 33.1<br>(31.9,<br>34.3) | 33.8<br>(33.2,<br>34.5) | 34.0<br>(33.1,<br>35.0) | 34.0<br>(33.0,<br>35.1) | 35.0<br>(33.9,<br>36.0) | 35.7<br>(35.1,<br>36.2) | <.001 | 0.43 |
| High                     | 37.1<br>(35.8,<br>38.4) | 37.6<br>(36.5,<br>38.6) | 37.3<br>(36.2,<br>38.4) | 38.6<br>(37.4,<br>39.9) | 38.3<br>(36.9,<br>39.8) | 41.0<br>(40.1,<br>41.8) | <.001 | 0.03 |

Abbreviations: NH Black: non-Hispanic Black; NH White: non-Hispanic White; PIR: poverty income ratio; BMI: body mass index; SES: socioeconomic status

<sup>a</sup> Values are energy-adjusted means (95% confidence interval)

<sup>c</sup> Models include time trend as a single continuous term adjusted for total energy intake; the midpoint of each survey time interval was used as a scored trend variable.

<sup>3</sup> Models include time trend as a continuous term and quadratic term adjusted for total energy intake. Only *P*-value for the quadratic term is presented.

**eTable 3. Energy-Adjusted Alternate Healthy Eating Index-2010 Component Scores Without the Trans-Fat Component. Data are based on adults aged 20-85 from NHANES 1999-2010<sup>a</sup>**

|                                              | 1999-<br>2000        | 2001-<br>2002        | 2003-<br>2004        | 2005-<br>2006        | 2007-<br>2008        | 2009-<br>2010        | $P_{\text{linear trend}}^b$ |
|----------------------------------------------|----------------------|----------------------|----------------------|----------------------|----------------------|----------------------|-----------------------------|
| Vegetables                                   | 3.0<br>(2.8,<br>3.3) | 2.9<br>(2.7,<br>3.2) | 2.9<br>(2.8,<br>3.1) | 3.0<br>(2.7,<br>3.2) | 2.8<br>(2.7,<br>3.0) | 2.9<br>(2.7,<br>3.1) | 0.26                        |
| Fruit                                        | 2.5<br>(2.2,<br>2.9) | 2.7<br>(2.5,<br>2.9) | 2.6<br>(2.3,<br>2.8) | 2.8<br>(2.5,<br>3.0) | 2.9<br>(2.7,<br>3.2) | 3.2<br>(3.1,<br>3.3) | <.001                       |
| Whole grains                                 | 1.7<br>(1.5,<br>1.9) | 1.8<br>(1.6,<br>2.0) | 1.7<br>(1.5,<br>1.9) | 1.6<br>(1.5,<br>1.7) | 1.8<br>(1.6,<br>2.0) | 2.2<br>(2.0,<br>2.3) | <.001                       |
| Sugar-sweetened beverages<br>and fruit juice | 3.5<br>(3.2,<br>3.8) | 3.7<br>(3.5,<br>4.0) | 3.7<br>(3.5,<br>4.0) | 4.3<br>(3.9,<br>4.6) | 4.2<br>(3.9,<br>4.4) | 4.4<br>(4.2,<br>4.6) | <.001                       |
| Nuts and legumes                             | 2.0<br>(1.7,<br>2.2) | 2.0<br>(1.8,<br>2.2) | 2.1<br>(1.9,<br>2.3) | 2.1<br>(1.9,<br>2.3) | 2.2<br>(1.9,<br>2.5) | 2.4<br>(2.2,<br>2.5) | <.001                       |
| Red/processed meat                           | 5.6<br>(5.3,<br>5.9) | 5.7<br>(5.5,<br>5.9) | 5.7<br>(5.5,<br>5.9) | 5.6<br>(5.4,<br>5.8) | 5.7<br>(5.5,<br>6.0) | 5.8<br>(5.6,<br>6.0) | 0.25                        |
| Long-chain (n-3) fats<br>(EPA+DHA)           | 2.3<br>(2.1,<br>2.5) | 2.2<br>(2.1,<br>2.4) | 2.4<br>(2.2,<br>2.6) | 2.5<br>(2.3,<br>2.7) | 2.4<br>(2.3,<br>2.6) | 2.5<br>(2.3,<br>2.6) | 0.07                        |
| PUFA                                         | 5.6<br>(5.4,<br>5.7) | 5.5<br>(5.4,<br>5.7) | 5.9<br>(5.7,<br>6.1) | 5.9<br>(5.7,<br>6.0) | 6.0<br>(5.9,<br>6.2) | 6.1<br>(6.0,<br>6.3) | <.001                       |
| Sodium                                       | 5.0<br>(4.8,<br>5.1) | 5.1<br>(4.9,<br>5.2) | 4.9<br>(4.7,<br>5.0) | 4.8<br>(4.7,<br>4.9) | 4.8<br>(4.7,<br>5.0) | 4.5<br>(4.4,<br>4.7) | <.001                       |
| Alcohol                                      | 3.0<br>(2.9,<br>3.2) | 3.0<br>(2.9,<br>3.2) | 3.0<br>(2.9,<br>3.2) | 3.1<br>(3.0,<br>3.3) | 3.0<br>(2.9,<br>3.2) | 3.1<br>(3.0,<br>3.3) | 0.22                        |

Abbreviations: EPA: eicosapentaenoic acid; DHA: docosahexaenoic acid; PUFA: polyunsaturated fatty acids

<sup>a</sup> Values are energy-adjusted means (95% confidence interval). For fruits, vegetables, whole grains, nuts and legumes, long-chain (n-3) fats, PUFA, and alcohol, a higher score corresponded to higher intake. For *trans* fat, sugar-sweetened beverages, red/processed meat, and sodium, a higher score corresponded to lower intake.

<sup>b</sup> Models for time trend adjusted for total energy intake; the midpoint of each survey time interval was used as a scored trend variable.

**eTable 4. Healthy Eating Index 2010 Scores Across Subpopulations. Data are based on adults aged 20-85 from NHANES 1999-2010<sup>a</sup>**

|                       | 1999-<br>2000<br>(N=4236<br>) | 2001-<br>2002<br>(N=4736<br>) | 2003-<br>2004<br>(N=4447<br>) | 2005-<br>2006<br>(N=4519<br>) | 2007-<br>2008<br>(N=5416<br>) | 2009-<br>2010<br>(N=5759<br>) | $P$ linear<br>trend <sup>b</sup> | $P$<br>quadra<br>tic <sup>c</sup><br>term |
|-----------------------|-------------------------------|-------------------------------|-------------------------------|-------------------------------|-------------------------------|-------------------------------|----------------------------------|-------------------------------------------|
| Total                 | 46.6<br>(45.0,<br>48.2)       | 47.7<br>(46.7,<br>48.6)       | 47.5<br>(46.2,<br>48.7)       | 48.7<br>(47.7,<br>49.6)       | 49.0<br>(47.6,<br>50.3)       | 49.6<br>(48.9,<br>50.4)       | <.001                            | 0.94                                      |
| Gender                |                               |                               |                               |                               |                               |                               |                                  |                                           |
| Female                | 47.3<br>(45.3,<br>49.3)       | 48.7<br>(47.4,<br>49.9)       | 48.3<br>(46.7,<br>49.8)       | 50.0<br>(48.9,<br>51.1)       | 50.0<br>(48.3,<br>51.8)       | 51.1<br>(50.3,<br>51.9)       | <.001                            | 0.99                                      |
| Male                  | 45.9<br>(44.4,<br>47.3)       | 46.6<br>(45.6,<br>47.7)       | 46.6<br>(45.5,<br>47.7)       | 47.2<br>(46.1,<br>48.2)       | 47.7<br>(46.5,<br>48.9)       | 48.0<br>(47.0,<br>48.9)       | 0.007                            | 0.85                                      |
| Age groups (years)    |                               |                               |                               |                               |                               |                               |                                  |                                           |
| 20-39                 | 42.8<br>(41.3,<br>44.4)       | 43.7<br>(42.3,<br>45.1)       | 44.2<br>(42.6,<br>45.9)       | 45.1<br>(43.7,<br>46.5)       | 45.6<br>(44.1,<br>47.1)       | 46.9<br>(45.7,<br>48.1)       | <.001                            | 0.70                                      |
| 40-59                 | 47.3<br>(45.0,<br>49.6)       | 49.0<br>(47.9,<br>50.0)       | 47.8<br>(46.3,<br>49.2)       | 49.2<br>(47.9,<br>50.6)       | 49.4<br>(47.4,<br>51.4)       | 50.4<br>(49.4,<br>51.4)       | 0.008                            | 0.53                                      |
| ≥60                   | 52.1<br>(51.0,<br>53.2)       | 52.2<br>(51.0,<br>53.5)       | 52.3<br>(51.2,<br>53.4)       | 53.4<br>(52.3,<br>54.6)       | 53.5<br>(52.2,<br>54.8)       | 52.4<br>(51.4,<br>53.4)       | 0.25                             | 0.14                                      |
| Education             |                               |                               |                               |                               |                               |                               |                                  |                                           |
| < 12 years            | 44.7<br>(43.3,<br>46.1)       | 44.4<br>(42.8,<br>45.9)       | 45.6<br>(44.3,<br>46.8)       | 46.9<br>(45.5,<br>48.3)       | 45.3<br>(43.9,<br>46.7)       | 46.7<br>(45.4,<br>48.0)       | 0.02                             | 0.81                                      |
| Completed<br>12 years | 44.8<br>(43.0,<br>46.6)       | 45.2<br>(43.8,<br>46.6)       | 44.8<br>(43.3,<br>46.3)       | 45.8<br>(44.6,<br>47.0)       | 46.6<br>(45.2,<br>48.0)       | 46.1<br>(44.7,<br>47.4)       | 0.09                             | 0.93                                      |
| Some<br>college       | 46.4<br>(44.7,<br>48.0)       | 47.5<br>(46.3,<br>48.6)       | 47.2<br>(45.7,<br>48.6)       | 48.1<br>(47.0,<br>49.2)       | 49.4<br>(48.0,<br>50.7)       | 48.9<br>(48.0,<br>49.7)       | 0.002                            | 0.70                                      |
| Completed<br>college  | 51.5<br>(49.2,<br>53.8)       | 52.6<br>(50.9,<br>54.2)       | 52.1<br>(50.7,<br>53.5)       | 53.2<br>(51.8,<br>54.6)       | 53.5<br>(51.9,<br>55.1)       | 55.0<br>(53.8,<br>56.1)       | <.001                            | 0.40                                      |
| Family PIR            |                               |                               |                               |                               |                               |                               |                                  |                                           |
| < 1.30                | 44.0<br>(42.2,<br>45.8)       | 43.7<br>(42.4,<br>45.0)       | 44.5<br>(42.5,<br>46.6)       | 46.5<br>(44.9,<br>48.1)       | 45.2<br>(43.2,<br>47.3)       | 46.0<br>(45.1,<br>46.9)       | 0.01                             | 0.81                                      |
| 1.30 - 3.49           | 45.5<br>(44.1,<br>46.8)       | 46.6<br>(45.2,<br>48.0)       | 47.5<br>(45.9,<br>49.1)       | 47.3<br>(46.2,<br>48.3)       | 48.5<br>(47.2,<br>49.8)       | 48.6<br>(47.5,<br>49.8)       | <.001                            | 0.69                                      |
| ≥ 3.50                | 48.8<br>(46.7,<br>51.0)       | 50.2<br>(49.0,<br>51.4)       | 48.9<br>(47.6,<br>50.3)       | 50.6<br>(49.2,<br>51.9)       | 50.6<br>(49.0,<br>52.1)       | 52.1<br>(50.9,<br>53.4)       | 0.001                            | 0.30                                      |
| Race/Ethnicity        |                               |                               |                               |                               |                               |                               |                                  |                                           |
| NH white              | 46.9<br>(44.8,<br>49.0)       | 48.0<br>(46.8,<br>49.2)       | 47.7<br>(46.2,<br>49.2)       | 49.3<br>(48.3,<br>50.3)       | 49.2<br>(47.2,<br>51.2)       | 50.2<br>(49.2,<br>51.1)       | 0.001                            | 0.99                                      |
| NH black              | 43.8                          | 44.4                          | 44.7                          | 45.1                          | 45.8                          | 46.0                          | 0.04                             | 0.79                                      |

|                               |                         |                         |                         |                         |                         |                         |       |      |
|-------------------------------|-------------------------|-------------------------|-------------------------|-------------------------|-------------------------|-------------------------|-------|------|
|                               | (42.0,<br>45.6)         | (42.3,<br>46.6)         | (43.1,<br>46.2)         | (43.4,<br>46.9)         | (44.7,<br>46.9)         | (44.3,<br>47.7)         |       |      |
| Mexican<br>American           | 47.4<br>(46.2,<br>48.6) | 48.5<br>(47.2,<br>49.8) | 47.3<br>(45.0,<br>49.7) | 48.2<br>(46.1,<br>50.2) | 48.9<br>(48.0,<br>49.9) | 48.1<br>(47.3,<br>48.9) | 0.21  | 0.93 |
| Other                         | 47.1<br>(44.7,<br>49.4) | 48.0<br>(46.1,<br>50.0) | 49.5<br>(47.7,<br>51.4) | 48.6<br>(47.3,<br>49.9) | 50.9<br>(49.2,<br>52.6) | 50.8<br>(49.8,<br>51.8) | 0.002 | 0.75 |
| <b>BMI (kg/m<sup>2</sup>)</b> |                         |                         |                         |                         |                         |                         |       |      |
| <25                           | 47.2<br>(44.6,<br>49.7) | 49.4<br>(48.2,<br>50.6) | 47.4<br>(45.5,<br>49.3) | 49.4<br>(48.0,<br>50.8) | 49.7<br>(47.8,<br>51.7) | 51.0<br>(50.0,<br>52.1) | 0.001 | 0.47 |
| 25-30                         | 47.5<br>(46.3,<br>48.8) | 47.4<br>(46.1,<br>48.8) | 48.8<br>(47.5,<br>50.2) | 49.6<br>(48.6,<br>50.7) | 49.0<br>(47.2,<br>50.8) | 50.6<br>(49.6,<br>51.5) | 0.001 | 0.99 |
| 30-35                         | 45.0<br>(43.7,<br>46.3) | 46.3<br>(44.9,<br>47.6) | 46.0<br>(44.8,<br>47.2) | 47.5<br>(46.6,<br>48.4) | 48.1<br>(46.7,<br>49.4) | 48.2<br>(47.3,<br>49.1) | <.001 | 0.65 |
| ≥35                           | 44.6<br>(42.9,<br>46.3) | 45.6<br>(44.0,<br>47.2) | 46.0<br>(44.5,<br>47.4) | 46.1<br>(44.3,<br>47.9) | 48.0<br>(46.9,<br>49.2) | 46.9<br>(45.1,<br>48.8) | 0.03  | 0.54 |
| <b>SES</b>                    |                         |                         |                         |                         |                         |                         |       |      |
| Low                           | 44.6<br>(43.4,<br>45.8) | 42.9<br>(40.9,<br>45.0) | 44.3<br>(42.7,<br>45.9) | 46.0<br>(44.2,<br>47.7) | 43.8<br>(41.7,<br>46.0) | 44.9<br>(43.7,<br>46.0) | 0.56  | 0.72 |
| Medium                        | 45.5<br>(44.0,<br>47.0) | 46.6<br>(45.7,<br>47.5) | 46.7<br>(45.2,<br>48.1) | 47.1<br>(46.1,<br>48.1) | 48.1<br>(46.7,<br>49.6) | 48.4<br>(47.6,<br>49.3) | <.001 | 0.90 |
| High                          | 50.2<br>(47.6,<br>52.7) | 51.1<br>(49.8,<br>52.5) | 49.9<br>(48.6,<br>51.1) | 52.0<br>(50.6,<br>53.4) | 52.0<br>(50.6,<br>53.4) | 53.1<br>(52.0,<br>54.3) | 0.001 | 0.42 |

Abbreviations: NH Black: non-Hispanic Black; NH White: non-Hispanic White; PIR: poverty income ratio; BMI: body mass index; SES: socioeconomic status

<sup>a</sup> Values are means (95% confidence interval)

<sup>b</sup> Models include time trend as a single continuous term; the midpoint of each survey time interval was used as a scored trend variable.

<sup>c</sup> Models include time trend as a continuous term and quadratic term. Only *P*-value for the quadratic term is presented.



**eTable 5. Healthy Eating Index-2010 Component Scores. Data are based on adults aged 20-85 from NHANES 1999-2010<sup>a</sup>**

|                              | 1999-<br>2000     | 2001-<br>2002     | 2003-<br>2004     | 2005-<br>2006     | 2007-<br>2008     | 2009-<br>2010     | $P_{\text{linear trend}}^b$ |
|------------------------------|-------------------|-------------------|-------------------|-------------------|-------------------|-------------------|-----------------------------|
| <b>Adequacy components</b>   |                   |                   |                   |                   |                   |                   |                             |
| Total vegetables             | 3.1 (3.0, 3.1)    | 3.1 (3.0, 3.1)    | 3.1 (3.0, 3.2)    | 3.1 (3.0, 3.2)    | 3.1 (3.1, 3.2)    | 3.0 (3.0, 3.1)    | 0.36                        |
| Greens and beans             | 1.1 (1.0, 1.3)    | 1.2 (1.1, 1.2)    | 1.2 (1.1, 1.3)    | 1.2 (1.1, 1.3)    | 1.2 (1.1, 1.3)    | 1.2 (1.2, 1.3)    | 0.32                        |
| Total fruit                  | 2.1 (1.9, 2.3)    | 2.2 (2.1, 2.3)    | 2.2 (2.0, 2.3)    | 2.3 (2.2, 2.4)    | 2.3 (2.2, 2.4)    | 2.4 (2.4, 2.5)    | <.001                       |
| Whole fruit                  | 1.9 (1.7, 2.1)    | 2.0 (1.9, 2.1)    | 2.0 (1.8, 2.2)    | 2.1 (2.0, 2.3)    | 2.2 (2.1, 2.3)    | 2.3 (2.3, 2.4)    | <.001                       |
| Whole grains                 | 1.7 (1.5, 1.8)    | 2.1 (1.9, 2.2)    | 2.0 (1.8, 2.2)    | 2.4 (2.2, 2.6)    | 2.3 (2.1, 2.5)    | 2.4 (2.3, 2.5)    | <.001                       |
| Dairy                        | 4.7 (4.5, 4.9)    | 4.8 (4.7, 5.0)    | 4.9 (4.6, 5.1)    | 5.1 (4.9, 5.3)    | 4.9 (4.7, 5.2)    | 5.0 (4.9, 5.1)    | 0.06                        |
| Total protein foods          | 3.9 (3.8, 3.9)    | 4.0 (3.9, 4.1)    | 4.1 (4.1, 4.2)    | 4.2 (4.1, 4.2)    | 4.2 (4.1, 4.3)    | 4.2 (4.1, 4.2)    | <.001                       |
| Seafood and plant proteins   | 1.8 (1.6, 1.9)    | 1.7 (1.7, 1.8)    | 1.9 (1.7, 2.0)    | 1.9 (1.8, 2.0)    | 1.9 (1.8, 2.0)    | 2.0 (1.9, 2.1)    | <.001                       |
| Fatty acids                  | 4.8 (4.6, 5.0)    | 5.0 (4.8, 5.1)    | 5.0 (4.8, 5.1)    | 4.7 (4.6, 4.8)    | 4.9 (4.7, 5.0)    | 5.0 (4.8, 5.1)    | 0.49                        |
| <b>Moderation components</b> |                   |                   |                   |                   |                   |                   |                             |
| Sodium                       | 4.9 (4.7, 5.1)    | 5.2 (5.0, 5.4)    | 4.8 (4.6, 5.0)    | 4.5 (4.4, 4.7)    | 4.5 (4.4, 4.6)    | 4.0 (3.9, 4.2)    | <.001                       |
| Refined grains               | 6.1 (5.9, 6.3)    | 5.8 (5.6, 6.0)    | 5.8 (5.6, 6.0)    | 5.9 (5.7, 6.0)    | 5.9 (5.7, 6.0)    | 5.9 (5.7, 6.1)    | 0.67                        |
| Empty calories               | 10.6 (10.0, 11.2) | 10.7 (10.2, 11.1) | 10.5 (10.0, 11.1) | 11.3 (10.9, 11.7) | 11.5 (11.0, 12.0) | 12.1 (11.8, 12.5) | <.001                       |

<sup>a</sup> Values are means (95% confidence interval).

<sup>b</sup> Models include the midpoint of each survey time interval was used as a scored time trend variable.

**eTable 6. Covariate-Adjusted Healthy Eating Index-2010 Score Across Subpopulations. Data are based on adults aged 20-85 from NHANES 1999-2010**

|                                       | N         | 1999-2000               | 2001-2002               | 2003-2004               | 2005-2006               | 2007-2008               | 2009-2010               | $P_{\text{linear trend}}^c$ | $P_{\text{interaction}}^d$ |
|---------------------------------------|-----------|-------------------------|-------------------------|-------------------------|-------------------------|-------------------------|-------------------------|-----------------------------|----------------------------|
| <b>Gender<sup>a</sup></b>             |           |                         |                         |                         |                         |                         |                         |                             |                            |
| Female                                | 151<br>40 | 48.5<br>(46.9,<br>50.1) | 49.6<br>(48.5,<br>50.8) | 49.4<br>(48.1,<br>50.7) | 50.7<br>(49.6,<br>51.7) | 50.8<br>(49.4,<br>52.2) | 51.6<br>(50.7,<br>52.5) | <.001                       | 0.02                       |
| Male                                  | 139<br>69 | 47.5<br>(46.2,<br>48.8) | 47.5<br>(46.6,<br>48.5) | 47.7<br>(46.7,<br>48.7) | 48.0<br>(47.2,<br>48.9) | 48.5<br>(47.5,<br>49.4) | 48.5<br>(47.7,<br>49.4) | 0.04                        |                            |
| $P_{\text{gender effect}}^b$          |           | 0.21                    | <.001                   | 0.03                    | <.001                   | <.001                   | <.001                   |                             |                            |
| <b>Age groups (years)<sup>a</sup></b> |           |                         |                         |                         |                         |                         |                         |                             |                            |
| 20-39                                 | 101<br>71 | 43.8<br>(42.5,<br>45.2) | 44.2<br>(43.0,<br>45.4) | 45.0<br>(43.9,<br>46.1) | 45.5<br>(44.2,<br>46.7) | 45.9<br>(44.9,<br>47.0) | 47.0<br>(46.0,<br>48.0) | <.001                       | <.001                      |
| 40-59                                 | 898<br>3  | 47.0<br>(45.0,<br>49.0) | 48.4<br>(47.5,<br>49.2) | 47.4<br>(46.0,<br>48.7) | 48.5<br>(47.1,<br>49.8) | 48.7<br>(47.0,<br>50.5) | 49.7<br>(48.7,<br>50.7) | 0.006                       |                            |
| ≥60                                   | 995<br>5  | 52.9<br>(51.8,<br>54.0) | 52.7<br>(51.5,<br>53.8) | 52.7<br>(51.6,<br>53.8) | 53.8<br>(52.5,<br>55.1) | 53.6<br>(52.5,<br>54.6) | 52.4<br>(51.4,<br>53.5) | 0.95                        |                            |
| $P_{\text{age effect}}^b$             |           | <.001                   | <.001                   | <.001                   | <.001                   | <.001                   | <.001                   |                             |                            |
| <b>Education<sup>a</sup></b>          |           |                         |                         |                         |                         |                         |                         |                             |                            |
| < 12 years                            | 886<br>4  | 45.7<br>(44.5,<br>46.8) | 46.0<br>(44.6,<br>47.3) | 46.6<br>(45.4,<br>47.7) | 47.9<br>(46.6,<br>49.2) | 46.6<br>(45.6,<br>47.6) | 47.9<br>(46.4,<br>49.3) | 0.02                        | 0.21                       |
| Completed 12 years                    | 692<br>0  | 47.1<br>(45.4,<br>48.8) | 47.6<br>(46.2,<br>49)   | 47.1<br>(45.9,<br>48.2) | 47.7<br>(46.5,<br>49.0) | 48.4<br>(47.0,<br>49.7) | 48.1<br>(47.0,<br>49.3) | 0.10                        |                            |
| Some college                          | 772<br>1  | 47.1<br>(45.4,<br>48.9) | 47.9<br>(46.6,<br>49.2) | 48.0<br>(46.6,<br>49.3) | 48.8<br>(47.8,<br>49.9) | 49.7<br>(48.3,<br>51.1) | 49.2<br>(48.2,<br>50.2) | 0.004                       |                            |
| Completed college                     | 555<br>9  | 51.3<br>(49.1,<br>53.4) | 52.1<br>(50.4,<br>53.8) | 51.9<br>(50.3,<br>53.5) | 52.5<br>(50.8,<br>54.3) | 52.9<br>(51.0,<br>54.9) | 54.5<br>(53.1,<br>55.9) | 0.003                       |                            |
| $P_{\text{education effect}}^b$       |           | <.001                   | <.001                   | <.001                   | <.001                   | <.001                   | <.001                   |                             |                            |
| <b>Family PIR<sup>a</sup></b>         |           |                         |                         |                         |                         |                         |                         |                             |                            |
| < 1.30                                | 761<br>3  | 47.3<br>(45.4,<br>49.2) | 47.3<br>(46.4,<br>48.1) | 48.3<br>(46.7,<br>49.9) | 49.7<br>(48.3,<br>51.0) | 48.9<br>(47.4,<br>50.3) | 49.1<br>(48.3,<br>50.0) | 0.02                        | 0.94                       |
| 1.30 - 3.49                           | 103<br>86 | 47.8<br>(46.5,<br>49.1) | 48.5<br>(47.3,<br>49.7) | 49.1<br>(47.9,<br>50.4) | 49.2<br>(48.0,<br>50.3) | 50.1<br>(48.8,<br>51.3) | 50.1<br>(48.9,<br>51.2) | 0.005                       |                            |
| ≥ 3.50                                | 850<br>8  | 48.4<br>(46.8,<br>50.1) | 49.3<br>(48.0,<br>50.6) | 48.2<br>(46.9,<br>49.6) | 49.5<br>(48.4,<br>50.7) | 49.6<br>(48.4,<br>50.9) | 50.6<br>(49.4,<br>51.8) | 0.01                        |                            |
| $P_{\text{PIR effect}}^b$             |           | 0.003                   | <.001                   | 0.11                    | 0.03                    | 0.003                   | 0.004                   |                             |                            |
| <b>Race/Ethnicity<sup>a</sup></b>     |           |                         |                         |                         |                         |                         |                         |                             |                            |
| NH white                              | 143<br>74 | 46.5<br>(45.0,<br>48.0) | 47.2<br>(46.4,<br>48.0) | 47.0<br>(46.0,<br>48.0) | 48.1<br>(47.3,<br>48.9) | 48.1<br>(46.5,<br>49.7) | 48.8<br>(47.9,<br>49.7) | 0.002                       | 0.37                       |

|                                           |           |                         |                         |                         |                         |                         |                         |       |      |
|-------------------------------------------|-----------|-------------------------|-------------------------|-------------------------|-------------------------|-------------------------|-------------------------|-------|------|
|                                           |           | 48.1)                   | 48.0)                   | 48.0)                   | 49.0)                   | 49.8)                   | 49.7)                   |       |      |
| NH black                                  | 571<br>7  | 45.8<br>(44.2,<br>47.4) | 46.0<br>(44.0,<br>47.9) | 45.9<br>(44.5,<br>47.3) | 46.4<br>(45.0,<br>47.8) | 46.6<br>(45.5,<br>47.7) | 47.3<br>(45.6,<br>49.1) | 0.12  |      |
| Mexican<br>American                       | 592<br>2  | 49.2<br>(48.0,<br>50.3) | 50.4<br>(50.3,<br>50.5) | 49.3<br>(49.2,<br>49.3) | 49.8<br>(49.7,<br>49.8) | 50.7<br>(50.7,<br>50.8) | 49.8<br>(49.8,<br>49.8) | 0.46  |      |
| Other                                     | 309<br>6  | 48.6<br>(46.0,<br>51.2) | 49.2<br>(47.4,<br>51.0) | 50.6<br>(48.8,<br>52.3) | 49.6<br>(47.7,<br>51.6) | 51.7<br>(50.1,<br>53.3) | 51.3<br>(50.1,<br>52.5) | 0.01  |      |
| $P_{\text{race effect}}^b$                |           | <.001                   | <.001                   | <.001                   | <.001                   | <.001                   | 0.002                   |       |      |
| <b>BMI (kg/m<sup>2</sup>)<sup>a</sup></b> |           |                         |                         |                         |                         |                         |                         |       |      |
| <25                                       | 861<br>6  | 48.5<br>(46.7,<br>50.3) | 50.0<br>(48.9,<br>51.2) | 48.5<br>(47.1,<br>49.9) | 49.7<br>(48.6,<br>50.9) | 50.4<br>(49.0,<br>51.7) | 51.1<br>(50.0,<br>52.2) | 0.005 | 0.55 |
| 25-30                                     | 100<br>01 | 48.9<br>(47.8,<br>50.0) | 48.4<br>(47.2,<br>49.7) | 49.4<br>(48.1,<br>50.8) | 50.3<br>(49.2,<br>51.4) | 49.4<br>(47.8,<br>50.9) | 51.0<br>(50.0,<br>52.0) | 0.007 |      |
| 30-35                                     | 577<br>3  | 45.9<br>(44.5,<br>47.3) | 47.3<br>(46,<br>48.6)   | 47.3<br>(46.3,<br>48.4) | 48.4<br>(47.5,<br>49.3) | 48.9<br>(47.8,<br>49.9) | 48.9<br>(47.9,<br>49.9) | <.001 |      |
| ≥35                                       | 416<br>3  | 45.9<br>(43.9,<br>47.8) | 45.9<br>(44.2,<br>47.6) | 46.7<br>(45.4,<br>47.9) | 46.5<br>(44.8,<br>48.1) | 48.4<br>(46.9,<br>49.9) | 47.2<br>(45.5,<br>48.9) | 0.09  |      |
| $P_{\text{BMI effect}}^b$                 |           | <.001                   | <.001                   | 0.07                    | 0.003                   | 0.07                    | 0.001                   |       |      |

Abbreviations: NH Black: non-Hispanic black; NH white: non-Hispanic white; PIR: poverty income ratio; BMI: body mass index.

<sup>a</sup> Values are adjusted mean HEI-2010 scores (95% confidence interval) estimated by multivariate linear regressions. Adjusted covariates are gender (male, female), age group (20-39, 40-64, ≥65 years), PIR (<1.30, 1.30-3.49, ≥3.50), education (<12 years, completed 12 years, some college, completed college), race/ethnicity (non-Hispanic white, non-Hispanic black, Mexican American, other), and household size, except the variable of stratification.

<sup>b</sup> *P*-values for homogeneity estimated by the adjusted Wald F test with Bonferroni correction for multiple comparisons in multivariate linear regressions adjusted for covariates mentioned above.

<sup>c</sup> Multivariate linear regression models include time trend as a single continuous term; the midpoint of each survey time interval was used as a scored trend variable; models adjusted for covariates mentioned above, except the variable of stratification.

<sup>d</sup> *P*-values for interaction between socioeconomic variables and scored trend variable (midpoint of each survey time interval) in multivariate linear regressions adjusted for covariates mentioned above, except the variable of stratification. Age group, education, and family PIR were treated as ordinal variable by using medium value of each category; *P*<sub>interaction</sub> was calculated from the Wald t test. Race/ethnicity was treated as nominal variable; *P*<sub>interaction</sub> was calculated from the adjusted Wald F test.

**eFigure 1. Healthy Eating Index-2010 Component Among Adults Aged 20-85 Years by the NHANES Survey Cycle**

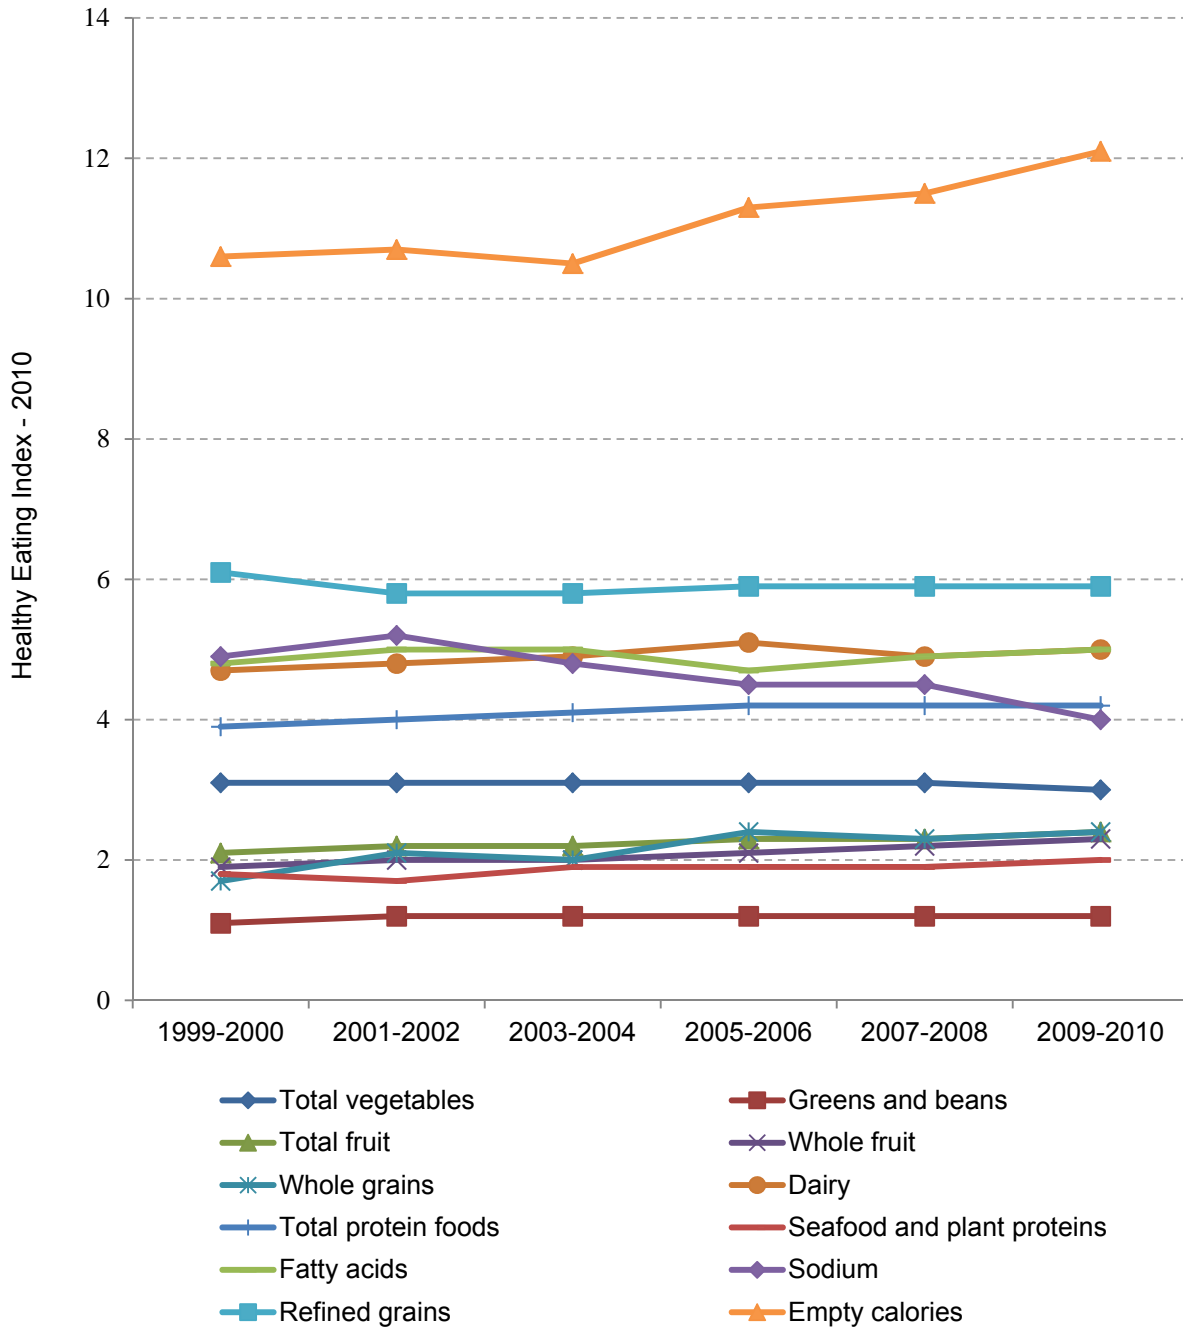

Data are presented as means. For total fruit, whole fruit, total vegetables, greens and beans, whole grains, dairy, total protein foods, seafood and plant protein, and fatty acids, a higher score corresponded to higher intake. For refined grains, sodium, and empty calories, a higher score corresponded to lower intake.

**eFigure 2. Healthy Eating Index-2010 Score Among Different Socioeconomic Status by the NHANES Survey Cycle**

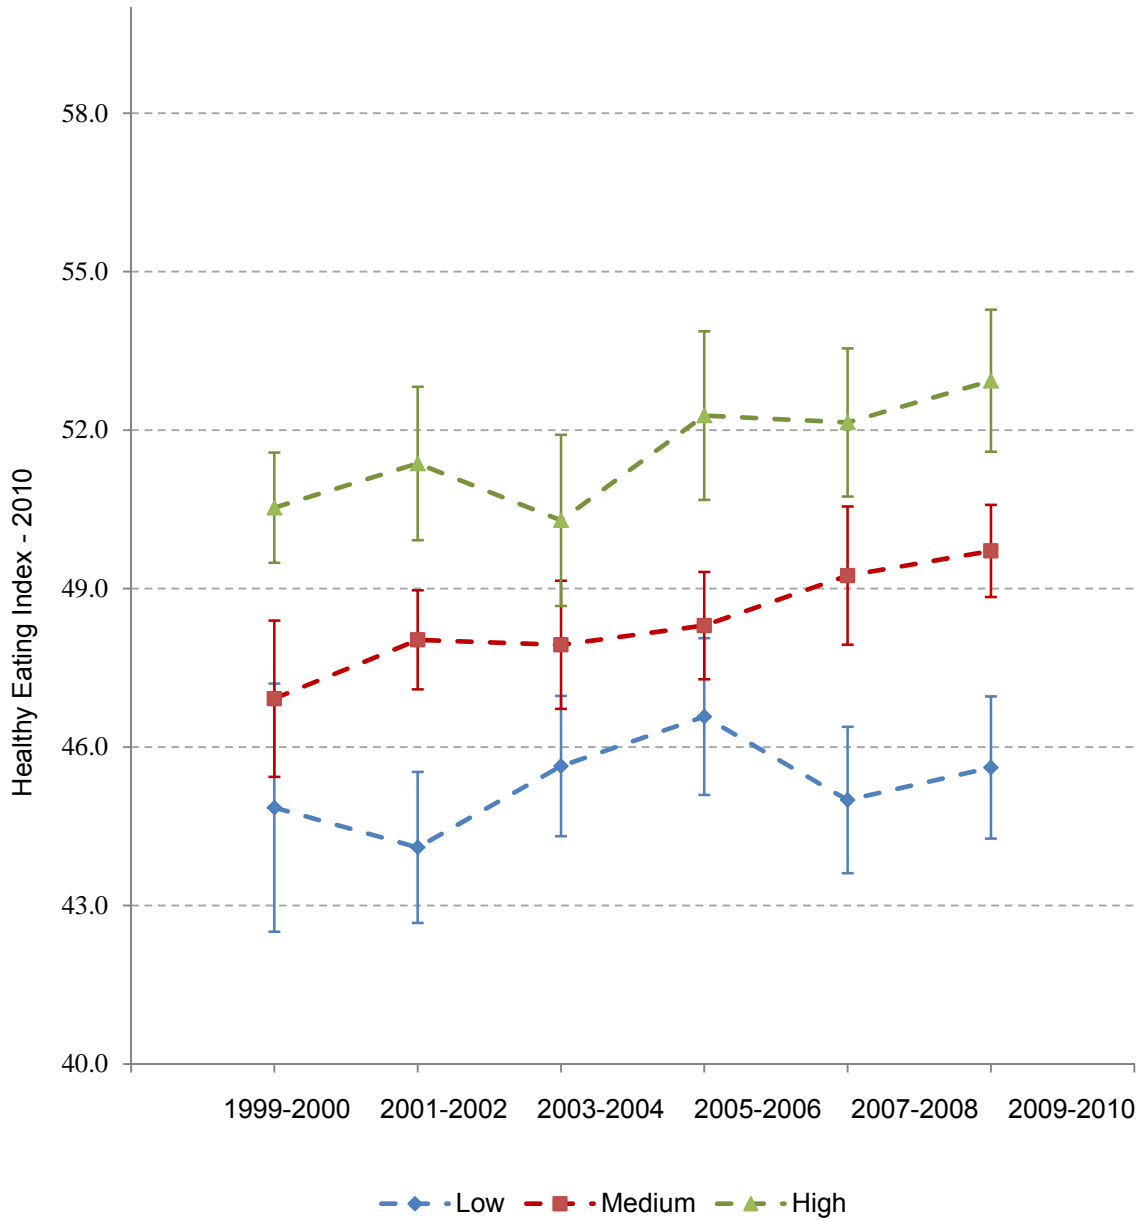

Data are presented as covariate-adjusted means and 95% confidence intervals. Participants with more than 12 completed years of education attainment and a PIR  $\geq 3.5$  were categorized into high SES; participants with less than 12-year education attainment and a PIR  $< 1.30$  were categorized into low SES; and others were classified as medium SES. Values were estimated from multivariate linear regression by adjusting for gender (male, female), age group (20-39, 40-64,  $\geq 65$  years), race/ethnicity (non-Hispanic white, non-Hispanic black, Mexican American, other), and household size.
